# Supplementary material for: Safety and Efficacy of Ambrisentan–Phosphodiesterase Type 5 (PDE5) Inhibitor Combination Therapy for Japanese Pulmonary Arterial Hypertension Patients in Real-World Clinical Practice
Source: PubMed Central journal article supplement — Circ Rep. 2019 May 29;1(6):268–75. doi: 10.1253/circrep.CR-19-0029 (PMC7889478; doi:10.1253/circrep.cr-19-0029), 2019-05-29
Supplement: circrep-1-268-s001.pdf [file circrep-1-268-s001.pdf]

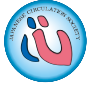

*Circulation Reports*  
*Circ Rep* 2019; 1: 268–275  
doi:10.1253/circrep.CR-19-0029

**Supplementary File**

---

## **Safety and Efficacy of Ambrisentan–Phosphodiesterase Type 5 (PDE5) Inhibitor Combination Therapy for Japanese Pulmonary Arterial Hypertension Patients in Real-World Clinical Practice**

---

Masaharu Kataoka, MD, PhD; Toru Satoh, MD, PhD; Hiromi Matsubara, MD, PhD;  
Koji Yamamoto, MD, PhD; Tsukasa Inada, MD, PhD; Kazunari Umezawa;  
Tomohiko Takahashi; Atsushi Nakano, MD, PhD; Keichi Fukuda, MD, PhD

Supplementary Table 1. Safety information by presence/absence of CTD-PAH

|                                           | All patients | CTD-PAH   | non-CTD-PAH |
|-------------------------------------------|--------------|-----------|-------------|
| Number of patients included               | 48           | 8         | 40          |
| Number of patients with onset of ADRs (%) | 10 (20.8)    | 2 (25.0)  | 8 (20.0)    |
| Number of ADRs                            | 14           | 3         | 11          |
| Number of events by types of ADRs (%)     |              |           |             |
| Headache                                  | 4 (8.3)      | 0         | 4 (10.0)    |
| Face oedema                               | 2 (4.2)      | 0         | 2 (5.0)     |
| Angina pectoris                           | 1 (2.1)      | 0         | 1 (2.0)     |
| Hyperaemia                                | 1 (2.1)      | 1 (12.50) | 0           |
| Dyspnoea                                  | 1 (2.1)      | 0         | 1 (2.0)     |
| Pulmonary hypertension                    | 1 (2.1)      | 0         | 1 (2.0)     |
| Nausea                                    | 1 (2.1)      | 0         | 1 (2.0)     |
| Hepatic function abnormal                 | 1 (2.1)      | 0         | 1 (2.0)     |
| Oedema                                    | 1 (2.1)      | 1 (12.50) | 0           |
| Sudden death                              | 1 (2.1)      | 1 (12.50) | 0           |

Supplementary Table 2. Changes in functional parameters from baseline to post-treatment

(A) Presence or absence of CTD-PAH

|                    |                      |                | CTD-PAH     |           |                    | Non-CTD-PAH |            |                    |
|--------------------|----------------------|----------------|-------------|-----------|--------------------|-------------|------------|--------------------|
|                    |                      |                | n           | Mean±SD   | Means of variation | n           | Mean±SD    | Means of variation |
| Pulmonary function | FVC (%)              | At baseline    | 4           | 77.9±26.6 | -                  | 10          | 84.5±17.5  | -                  |
|                    |                      | Post-treatment | 4           | 83.7±20.2 | 5.8 (-5.4,17.0)    | 10          | 89.70±12.4 | 5.2 (-2.3, 12.7)   |
|                    |                      | Test           | w: P=0.2500 |           |                    | w: P=0.3105 |            |                    |
|                    | TLC (%)              | At baseline    | 3           | 84.4±41.4 | -                  | 7           | 87.1±10.4  | -                  |
|                    |                      | Post-treatment | 3           | 92.1±30.7 | 7.7 (-20.3, 35.8)  | 7           | 83.6±14.3  | -3.5 (-15.4, 8.4)  |
|                    |                      | Test           | w: P=0.5000 |           |                    | w: P=0.4688 |            |                    |
|                    | FEV <sub>1</sub> (%) | At baseline    | 5           | 78.5±23.9 | -                  | 11          | 82.8±15.5  | -                  |
|                    |                      | Post-treatment | 5           | 84.1±18.4 | 5.6 (-1.8, 13.0)   | 11          | 82.2±10.6  | -0.6 (-9.0, 7.7)   |
|                    |                      | Test           | w: P=0.1875 |           |                    | w: P=0.5771 |            |                    |
|                    | SpO <sub>2</sub> (%) | At baseline    | 2           | 98.5±0.7  | -                  | 6           | 82.8±16.5  | -                  |
|                    |                      | Post-treatment | 2           | 96.0±0.0  | -2.5 (-8.9, 3.9)   | 6           | 88.8±11.7  | 6.0 (-5.5, 17.5)   |
|                    |                      | Test           | w: P=0.5000 |           |                    | w: P=0.4688 |            |                    |
|                    | SaO <sub>2</sub> (%) | At baseline    | 1           | 93.8      | -                  | 6           | 95.6±2.1   | -                  |
|                    |                      | Post-treatment | 1           | 95.5      | 1.7                | 6           | 95.8±1.0   | 0.3 (-2.28, 2.78)  |
|                    |                      | Test           | w: P=1.0000 |           |                    | w: P=1.0000 |            |                    |
|                    | DLco (mL/min/mmHg)   | At baseline    | 4           | 25.3±12.0 | -                  | 8           | 42.7±19.6  | -                  |
|                    |                      | Post-treatment | 4           | 24.0±13.1 | -1.3 (-7.8,5.3)    | 8           | 57.6±26.9  | 14.9 (-11.1, 40.9) |

|                               |                                    |                |             |                      |                           |             |                  |                         |
|-------------------------------|------------------------------------|----------------|-------------|----------------------|---------------------------|-------------|------------------|-------------------------|
|                               |                                    | Test           | w: P=0.6250 |                      |                           | w: P=0.0156 |                  |                         |
| Hemodynamics                  | RAP<br>(mmHg)                      | At baseline    | 2           | 9.0±2.8              | -                         | 15          | 7.9±4.9          | -                       |
|                               |                                    | Post-treatment | 2           | 3.5±0.7              | -5.5 (-37.3,26.3)         | 15          | 5.6±2.2          | -2.3 (-5.6, 1.0)        |
|                               |                                    | Test           | w: P=0.5000 |                      |                           | w: P=0.2800 |                  |                         |
|                               | PAWP<br>(mmHg)                     | At baseline    | 2           | 4.5±2.1              | -                         | 16          | 8.6±2.6          | -                       |
|                               |                                    | Post-treatment | 2           | 7.0±0.0              | 2.5 (-16.6, 21.6)         | 16          | 9.5±2.8          | 0.9 (-1.4, 3.2)         |
|                               |                                    | Test           | w: P=0.5000 |                      |                           | w: P=0.4461 |                  |                         |
|                               | mPAP<br>(mmHg)                     | At baseline    | 2           | 47.5±9.2             | -                         | 18          | 44.6±14.8        | -                       |
|                               |                                    | Post-treatment | 2           | 26.5±6.4             | -21 (-46.4, 4.4)          | 18          | 31.9±8.8         | -12.7 (-19, -6.3)       |
|                               |                                    | Test           | w: P=0.5000 |                      |                           | w: P=0.0005 |                  |                         |
|                               | CO<br>(L/min)                      | At baseline    | 2           | 2.8±1.8              | -                         | 16          | 4.2±2.2          | -                       |
|                               |                                    | Post-treatment | 2           | 5.2±2.2              | 2.4 (-1.7, 6.5)           | 16          | 5.3±1.7          | 1.1 (-0.8, 3.0)         |
|                               |                                    | Test           | w: P=0.5000 |                      |                           | w: P=0.0833 |                  |                         |
|                               | PVR<br>(dyn·sec·cm <sup>-5</sup> ) | At baseline    | 2           | 1595.4±1205.4        | -                         | 17          | 873.2±627.3      | -                       |
|                               |                                    | Post-treatment | 2           | 351.8±259.0          | -1243.6 (-9827.9, 7340.7) | 17          | 389.7±254.8      | -483.5 (-841.4, -125.7) |
|                               |                                    | Test           | w: P=0.5000 |                      |                           | w: P=0.0110 |                  |                         |
| Saturation (%)                | At baseline                        | 2              | 76.4±30.6   | -                    | 6                         | 96.0±2.3    | -                |                         |
|                               | Post-treatment                     | 2              | 96.8±1.8    | 20.4 (-238.8, 279.6) | 6                         | 94.9±1.5    | -1.1 (-4.2, 1.9) |                         |
|                               | Test                               | w: P=1.0000    |             |                      | w: P=0.5625               |             |                  |                         |
| CI<br>(L/min/m <sup>2</sup> ) | At baseline                        | 2              | 2.0±1.1     | -                    | 18                        | 2.6±1.0     | -                |                         |
|                               | Post-treatment                     | 2              | 3.6±1.4     | 1.7 (-1.2, 4.6)      | 18                        | 4.0±3.7     | 1.8 (-0.2, 3.9)  |                         |
|                               | Test                               | w: P=0.5000    |             |                      | w: P=0.0074               |             |                  |                         |

|                  |                      |                |             |             |                        |             |                  |                       |  |
|------------------|----------------------|----------------|-------------|-------------|------------------------|-------------|------------------|-----------------------|--|
|                  | SvO <sub>2</sub> (%) | At baseline    | 1           | 69.7        | -                      | 12          | 67.8±14.3        | -                     |  |
| Post-treatment   |                      | 1              | 70.2        | 0.5         | 12                     | 74.9±6.4    | 7.1 (-3.7, 17.8) |                       |  |
| Test             |                      | w: P=1.0000    |             |             |                        | w: P=0.2334 |                  |                       |  |
| Echocardiography | TRPG (mmHg)          | At baseline    | 5           | 59.2±31.9   | -                      | 17          | 63.3±23.8        | -                     |  |
|                  |                      | Post-treatment | 5           | 33.8±9.9    | -25.4 (-56.5, 5.7)     | 17          | 50.8±23.5        | -12.5 (-21.6, -3.3)   |  |
|                  |                      | Test           | w: P=0.0625 |             |                        |             | w: P=0.0104      |                       |  |
| Clinical status  | 6MWD (m)             | At baseline    | 1           | 250.0       | -                      | 4           | 343.3±210.6      | -                     |  |
|                  |                      | Post-treatment | 1           | 415.0       | 165                    | 4           | 439.8±121.2      | 96.5 (-104.2, 297.2)  |  |
|                  |                      | Test           | w: P=1.0000 |             |                        |             | w: P=0.1250      |                       |  |
|                  | BNP (pg/mL)          | At baseline    | 5           | 497.7±456.2 | -                      | 11          | 288.5±272.1      | -                     |  |
|                  |                      | Post-treatment | 5           | 216.9±250.5 | -280.7 (-703.0, 141.6) | 11          | 112.6±155.0      | -175.9 (-350.3, -1.4) |  |
| Test             | w: P=0.3125          |                |             |             | w: P=0.0674            |             |                  |                       |  |

Data are presented as mean ± standard deviation (SD), 95% CI, 95% confidence interval; FVC, forced vital capacity; TLC, total lung capacity; FEV1, forced expiratory volume in one second; SaO<sub>2</sub>, blood oxygen saturation; SpO<sub>2</sub>, percutaneous oxygen saturation; DLco, diffusing capacity for carbon monoxide; RAP, right arterial pressure; PAWP, mean pulmonary arterial wedge pressure; mPAP, mean pulmonary arterial pressure; CO, cardiac output; PVR, pulmonary vascular resistance; CI, cardiac index; SvO<sub>2</sub>, mixed venous oxygen saturation; TRPG, transtricuspid pressure gradient; 6MWD six-minute walk distance; BNP, brain natriuretic peptide.

W: paired Wilcoxon test

(B) Type of combination therapy

|                       |                           |                | Initial combination |           |                    | Sequential combination |            |                       |
|-----------------------|---------------------------|----------------|---------------------|-----------|--------------------|------------------------|------------|-----------------------|
|                       |                           |                | n                   | Mean±SD   | Means of variation | n                      | Mean±SD    | Means of variation    |
| Pulmonary<br>function | FVC (%)                   | At baseline    | 11                  | 83.4±21.9 | -                  | 3                      | 80.0±9.5   | -                     |
|                       |                           | Post-treatment | 11                  | 88.7±15.9 | 5.3 (-1.8, 12.4)   | 3                      | 85.5±8.7   | 5.5 (3.5, 7.5)        |
|                       |                           | Test           | w: P=0.3096         |           |                    | w: P=0.2500            |            |                       |
|                       | TLC (%)                   | At baseline    | 7                   | 79.2±17.6 | -                  | 3                      | 102.8±23.2 | -                     |
|                       |                           | Post-treatment | 7                   | 81.8±14.1 | 2.6(-10.2, 15.5)   | 3                      | 96.3±28.4  | -6.5 (-29.7, 16.6)    |
|                       |                           | Test           | w: P=0.8125         |           |                    | w: P=0.5000            |            |                       |
|                       | FEV <sub>1</sub> (%)      | At baseline    | 11                  | 80.0±19.6 | -                  | 5                      | 85.0±14.4  | -                     |
|                       |                           | Post-treatment | 11                  | 82.3±15.5 | 2.4 (-4.8, 9.7)    | 5                      | 83.9±4.0   | -1.1 (-16.4, 14.1)    |
|                       |                           | Test           | w: P=0.8311         |           |                    | w: P=1.0000            |            |                       |
|                       | SpO <sub>2</sub> (%)      | At baseline    | 7                   | 85.0±16.1 | -                  | 1                      | 99.0       | -                     |
|                       |                           | Post-treatment | 7                   | 89.7±10.9 | 4.7 (-5.1, 14.5)   | 1                      | 97.0       | -2                    |
|                       |                           | Test           | w: P=0.7344         |           |                    | -                      |            |                       |
|                       | SaO <sub>2</sub> (%)      | At baseline    | 6                   | 95.2±2.2  | -                  | 1                      | 96.3       | -                     |
|                       |                           | Post-treatment | 6                   | 95.8±1.1  | 0.58(-2, 3.2)      | 1                      | 96.0       | -0.3                  |
|                       |                           | Test           | w: P=0.6875         |           |                    | -                      |            |                       |
|                       | DLco<br>(mL/min/<br>mmHg) | At baseline    | 9                   | 38.7±19.2 | -                  | 3                      | 31.3±20.9  | -                     |
|                       |                           | Post-treatment | 9                   | 41.9±22.2 | 3.2 (-2.0, 8.4)    | 3                      | 59.6±44.2  | 28.36 (-104.3, 161.1) |
|                       |                           | Test           | w: P=0.0977         |           |                    | w: P=1.0000            |            |                       |

|                                    |                |                |              |                          |                    |             |                      |                  |
|------------------------------------|----------------|----------------|--------------|--------------------------|--------------------|-------------|----------------------|------------------|
| Hemodynamics                       | RAP<br>(mmHg)  | At baseline    | 13           | 8.8±4.9                  | -                  | 4           | 5.5±3.0              | -                |
|                                    |                | Post-treatment | 13           | 4.9±1.9                  | -3.9 (-7.5, -0.3)  | 4           | 6.8±2.9              | 1.25 (-3.3, 5.8) |
|                                    |                | Test           | w: P=0.0508  |                          |                    | w: P=0.6250 |                      |                  |
|                                    | PAWP<br>(mmHg) | At baseline    | 13           | 7.9±2.6                  | -                  | 5           | 9.0±3.5              | -                |
|                                    |                | Post-treatment | 13           | 8.8±2.9                  | 0.9 (-25.0, -13.0) | 5           | 10.4±2.4             | 1.4 (-4.0, 6.8)  |
|                                    |                | Test           | w: P=0.4629  |                          |                    | w: P=0.5000 |                      |                  |
|                                    | mPAP<br>(mmHg) | At baseline    | 14           | 49.3±14.3                | -                  | 6           | 34.7±7.5             | -                |
|                                    |                | Post-treatment | 14           | 30.3±8.9                 | -19 (-25.0, -13.0) | 6           | 34.0±7.7             | -0.7 (-4.9, 3.5) |
|                                    |                | Test           | w: P=0.0002  |                          |                    | w: P=0.8125 |                      |                  |
|                                    | CO<br>(L/min)  | At baseline    | 14           | 3.9±2.4                  | -                  | 4           | 4.7±0.9              | -                |
| Post-treatment                     |                | 14             | 5.5±1.6      | 1.58 (-0.5, 3.7)         | 4                  | 4.7±2.1     | 0.0 (-3.6, 3.6)      |                  |
| Test                               |                | w: P=0.0238    |              |                          | w: P=1.0000        |             |                      |                  |
| PVR<br>(dyn·sec·cm <sup>-5</sup> ) | At baseline    | 14             | 1135.3±714.7 | -                        | 5                  | 428.1±222.7 | -                    |                  |
|                                    | Post-treatment | 14             | 362.3±211.6  | -773.0 (-1198.6, -347.3) | 5                  | 451.1±351.0 | 23.0 (-316.4, 362.3) |                  |
|                                    | Test           | w: P=0.0023    |              |                          | w: P=1.0000        |             |                      |                  |
| Saturation (%)                     | At baseline    | 7              | 90.3±15.9    | -                        | 1                  | 96.6        | -                    |                  |
|                                    | Post-treatment | 7              | 95.7±1.3     | 5.4 (-9.1, 20.0)         | 1                  | 92.5        | -4.1                 |                  |
|                                    | Test           | w: P=0.6875    |              |                          | -                  |             |                      |                  |
| CI<br>(L/min/m <sup>2</sup> )      | At baseline    | 14             | 2.3±1.1      | -                        | 6                  | 3.0±0.6     | -                    |                  |
|                                    | Post-treatment | 14             | 4.9±4.1      | 2.6 (0.1, 5.2)           | 6                  | 3.0±0.7     | -0.1 (-1.1, 1.0)     |                  |
|                                    | Test           | w: P=0.0005    |              |                          | w: P=0.8438        |             |                      |                  |

|                  |                      |                |            |             |                      |            |             |                       |
|------------------|----------------------|----------------|------------|-------------|----------------------|------------|-------------|-----------------------|
|                  | SvO <sub>2</sub> (%) | At baseline    | 9          | 65.6±15.6   | -                    | 4          | 73.3±7.3    | -                     |
|                  |                      | Post-treatment | 9          | 76.1±5.2    | 10.5 (-3.2, 24.3)    | 4          | 70.8±7.7    | -2.4 (-14.6, 9.7)     |
|                  |                      | Test           | w:P=0.0977 |             |                      | w:P=0.6250 |             |                       |
| Echocardiography | TRPG (mmHg)          | At baseline    | 12         | 73.4±27.1   | -                    | 10         | 49.1±14.7   | -                     |
|                  |                      | Post-treatment | 12         | 49.0±27.0   | -24.4 (-38.0, -10.8) | 10         | 44.5±15.8   | -4.6 (-12.3, 3.1)     |
|                  |                      | Test           | w:P=0.0068 |             |                      | w:P=0.1270 |             |                       |
| Clinical status  | 6MWD (m)             | At baseline    | 5          | 324.6±187.1 | -                    | 0          | -           | -                     |
|                  |                      | Post-treatment | 5          | 434.8±105.6 | 110.2 (-30.7, 251.1) | 0          | -           | -                     |
|                  |                      | Test           | w:P=0.0625 |             |                      | -          |             |                       |
|                  | BNP (pg/mL)          | At baseline    | 10         | 379.0±281.8 | -                    | 6          | 311.9±445.4 | -                     |
|                  |                      | Post-treatment | 10         | 98.5±136.8  | -280.6(-497.4,-63.7) | 6          | 223.2±245.7 | -88.8 (-303.7, 126.2) |
|                  |                      | Test           | w:P=0.0137 |             |                      | w:P=1.0000 |             |                       |

Data are presented as mean ± standard deviation (SD), 95% CI, 95% confidence interval; FVC, forced vital capacity; TLC, total lung capacity; FEV1, forced expiratory volume in one second; SaO<sub>2</sub>, blood oxygen saturation; SpO<sub>2</sub>, percutaneous oxygen saturation; DLco, diffusing capacity for carbon monoxide; RAP, right arterial pressure; PAWP, mean pulmonary arterial wedge pressure; mPAP, mean pulmonary arterial pressure; CO, cardiac output; PVR, pulmonary vascular resistance; CI, cardiac index; SvO<sub>2</sub>, mixed venous oxygen saturation; TRPG, transtricuspid pressure gradient; 6MWD, six-minute walk distance; BNP, brain natriuretic peptide.

W: paired Wilcoxon test



(C) Concomitant use of intravenous epoprostenol

|              |                                    | n              | Mean±SD     | Means of variation |                        |
|--------------|------------------------------------|----------------|-------------|--------------------|------------------------|
| Hemodynamics | RAP (mmHg)                         | At baseline    | 4           | 7.3±5.4            | -                      |
|              |                                    | Post-treatment | 4           | 4.0±1.4            | -3.3(-10.9,4.4)        |
|              |                                    | Test           | w: P=0.3750 |                    |                        |
|              | PAWP (mmHg)                        | At baseline    | 5           | 9.6±3.6            | -                      |
|              |                                    | Post-treatment | 5           | 8.0±2.3            | -1.6(-7.2, 4.0)        |
|              |                                    | Test           | w: P=0.6250 |                    |                        |
|              | mPAP (mmHg)                        | At baseline    | 5           | 41.4±26.6          | -                      |
|              |                                    | Post-treatment | 5           | 29.2±10.4          | -12.2(-35.6, 11.2)     |
|              |                                    | Test           | w: P=0.4375 |                    |                        |
|              | CO (L/min)                         | At baseline    | 4           | 4.7±1.4            | -                      |
|              |                                    | Post-treatment | 4           | 4.9±1.1            | 0.1 (-3.9, 4.2)        |
|              |                                    | Test           | w: P=0.8750 |                    |                        |
|              | PVR<br>(dyn·sec·cm <sup>-5</sup> ) | At baseline    | 5           | 530.1±495.6        | -                      |
|              |                                    | Post-treatment | 5           | 338.4±167.1        | -191.7 (-699.0, 315.6) |
|              |                                    | Test           | w: P=0.8125 |                    |                        |
|              | Saturation (%)                     | At baseline    | 1           | 92.4               | -                      |
|              |                                    | Post-treatment | 1           | 94.9               | 2.5                    |
|              |                                    | Test           |             | -                  |                        |
|              | CI (L/min/m <sup>2</sup> )         | At baseline    | 5           | 3.0±0.9            | -                      |
|              |                                    | Post-treatment | 5           | 3.0±0.4            | -0.1 (-1.5, 1.5)       |

|                  |                      |                |             |             |                       |
|------------------|----------------------|----------------|-------------|-------------|-----------------------|
|                  |                      | Test           | w: P=0.8125 |             |                       |
|                  | SvO <sub>2</sub> (%) | At baseline    | 4           | 72.9±11.1   | -                     |
|                  |                      | Post-treatment | 4           | 75.5±1.4    | 2.7 (-15.5, 20.8)     |
|                  |                      | Test           | w: P=0.8750 |             |                       |
| Echocardiography | TRPG (mmHg)          | At baseline    | 6           | 52.5±34.8   | -                     |
|                  |                      | Post-treatment | 6           | 43.5±23.1   | -9 (-23.3, 5.3)       |
|                  |                      | Test           | w: P=0.1563 |             |                       |
| Clinical status  | 6MWD (m)             | At baseline    | 1           | 306.0       | -                     |
|                  |                      | Post-treatment | 1           | 325.0       | 19                    |
|                  |                      | Test           | -           |             |                       |
|                  | BNP (pg/mL)          | At baseline    | 3           | 411.6±219.8 | -                     |
|                  |                      | Post-treatment | 3           | 153.1±236.2 | -258.5 (-575.1, 58.2) |
|                  | Test                 | w: P=0.2500    |             |             |                       |

Data are presented as mean ± standard deviation (SD), 95% CI, 95% confidence interval; FVC, forced vital capacity; TLC, total lung capacity; FEV1, forced expiratory volume in one second; SaO<sub>2</sub>, blood oxygen saturation; SpO<sub>2</sub>, percutaneous oxygen saturation; DLco, diffusing capacity for carbon monoxide; RAP, right arterial pressure; PAWP, mean pulmonary arterial wedge pressure; mPAP, mean pulmonary arterial pressure; CO, cardiac output; PVR, pulmonary vascular resistance; CI, cardiac index; SvO<sub>2</sub>, mixed venous oxygen saturation; TRPG, transtricuspid pressure gradient; 6MWD, six-minute walk distance; BNP, brain natriuretic peptide.

W: paired Wilcoxon test
